# Supplementary material
Source: PubMed Central journal article supplement (PMC3273635)

## Supplemental Figures

Fig. S1. Effect of a 15 min preincubation with S1P on the action of endothelin-I. Upper panel: representative tracings of intracellular free-calcium concentration ( $[Ca^{2+}]_i$ ) of cells preincubated in the absence (left panel) or presence of 1  $\mu$ M S1P. Where indicated (arrow), 100 nM endothelin-1 was added. Lower panel: increases of free-calcium concentration ( $[Ca^{2+}]_i$ ) induced by 100 nM endothelin-1 in cells preincubated in the absence (solid bar) or presence of 1  $\mu$ M S1P (open bar). The means are plotted with vertical lines representing the S.E.M of 4-5 determinations using different cell preparations.

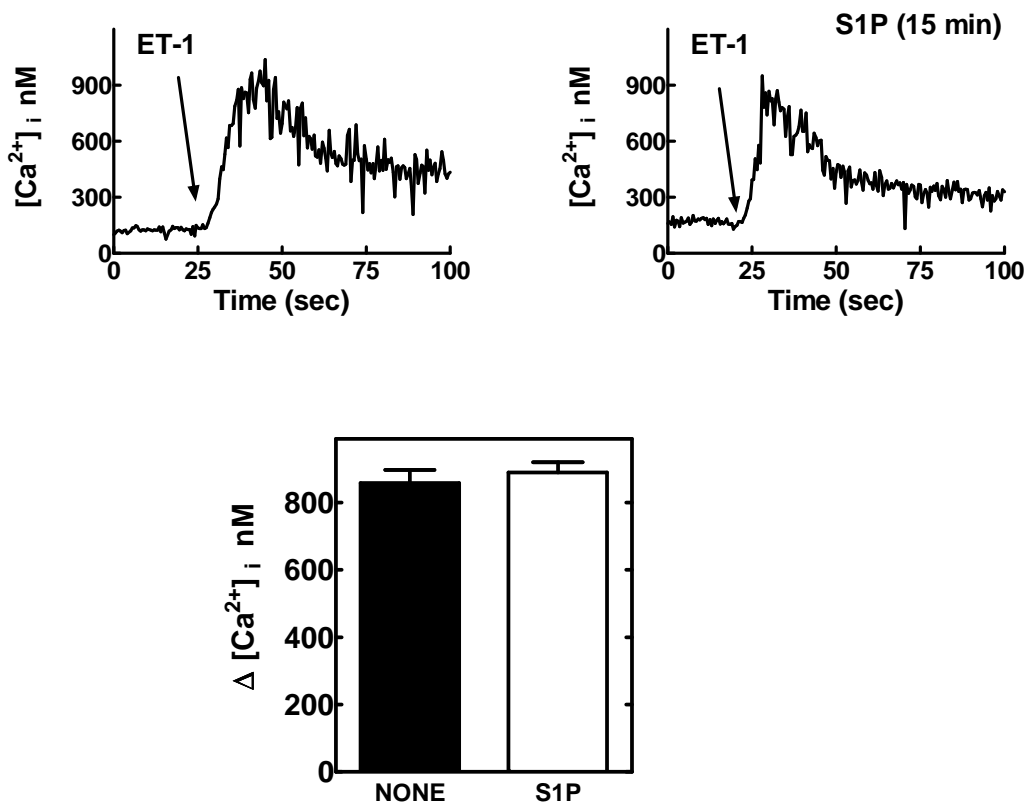

Fig. S2. Plasma membrane associated fluorescence of cells expressing  $\alpha_{1B}$ -adrenergic receptor-enhanced green fluorescent protein construction. Cells were incubated in the absence of any agent (BASAL, time 0; Vehicle, 15 min) or presence of 1  $\mu$ M S1P or 10  $\mu$ M noradrenaline (NA). Data correspond to experiments shown in Fig 10. \*  $p < 0.001$  vs Basal or Vehicle.

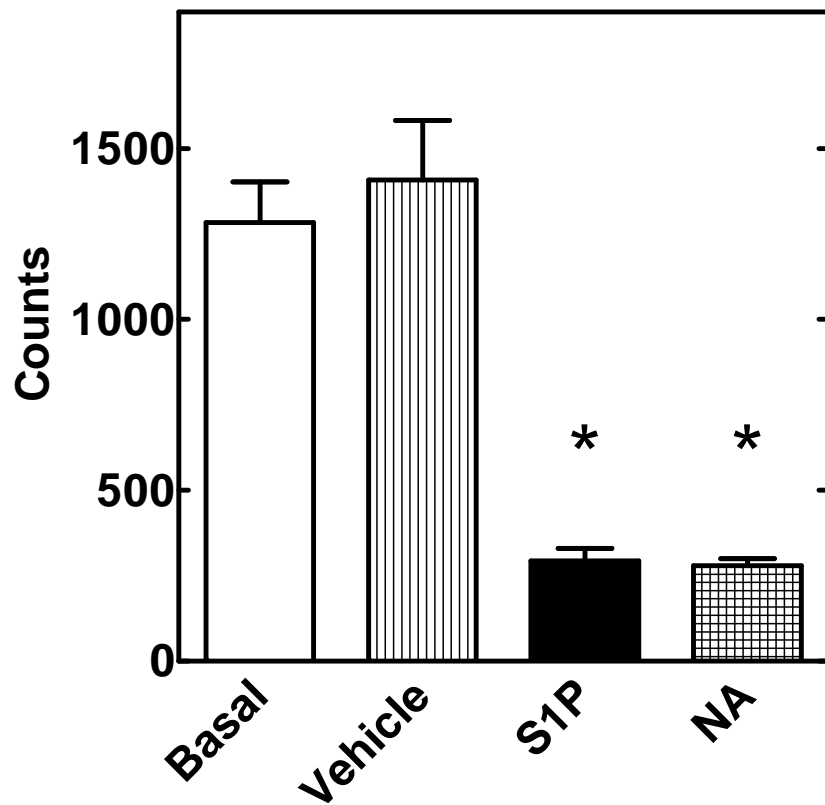

Fig. S3. Confocal microscopy images of cells expressing  $\alpha_{1B}$ -adrenergic receptor-enhanced green fluorescent protein construction; effect of  $S1P_1$  receptor knock down. Cells transfected with the empty vector or the  $S1P_1$  shRNA were used and incubated in the absence or presence of 1  $\mu$ M S1P. Images were taken at the beginning of incubation (Time 0') and at the end of the incubation with the agents (Time 15'); immediately thereafter, the membrane marker FM4-64 (red) was added and images were taken. Merge images (end of incubation -FM4-64) are presented for colocalization (yellow). Quantitative analysis of plasma membrane-associated fluorescence is shown below the images.\*  $p < 0.001$  vs. vector basal; \*\*  $p < 0.01$  vs. vector basal.

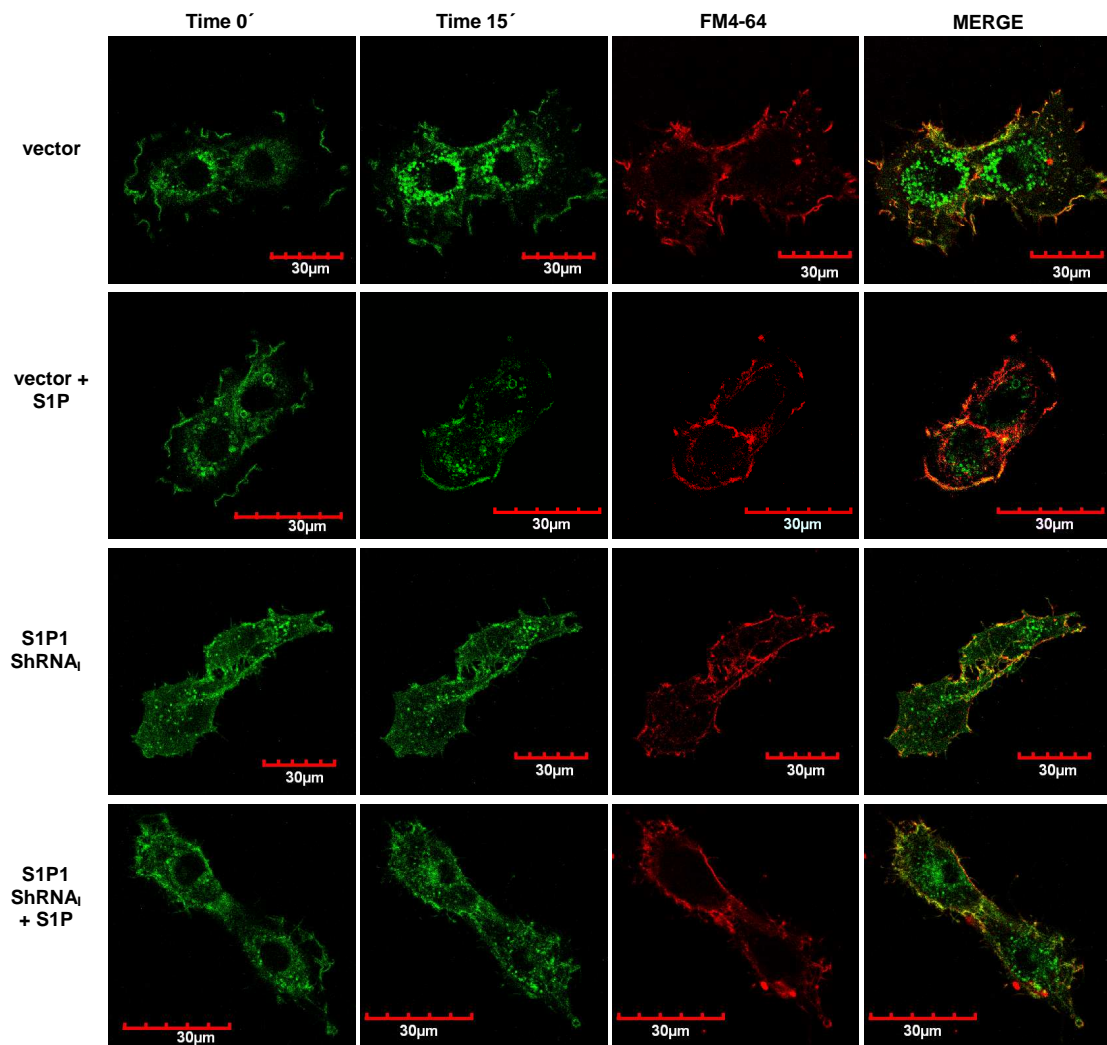

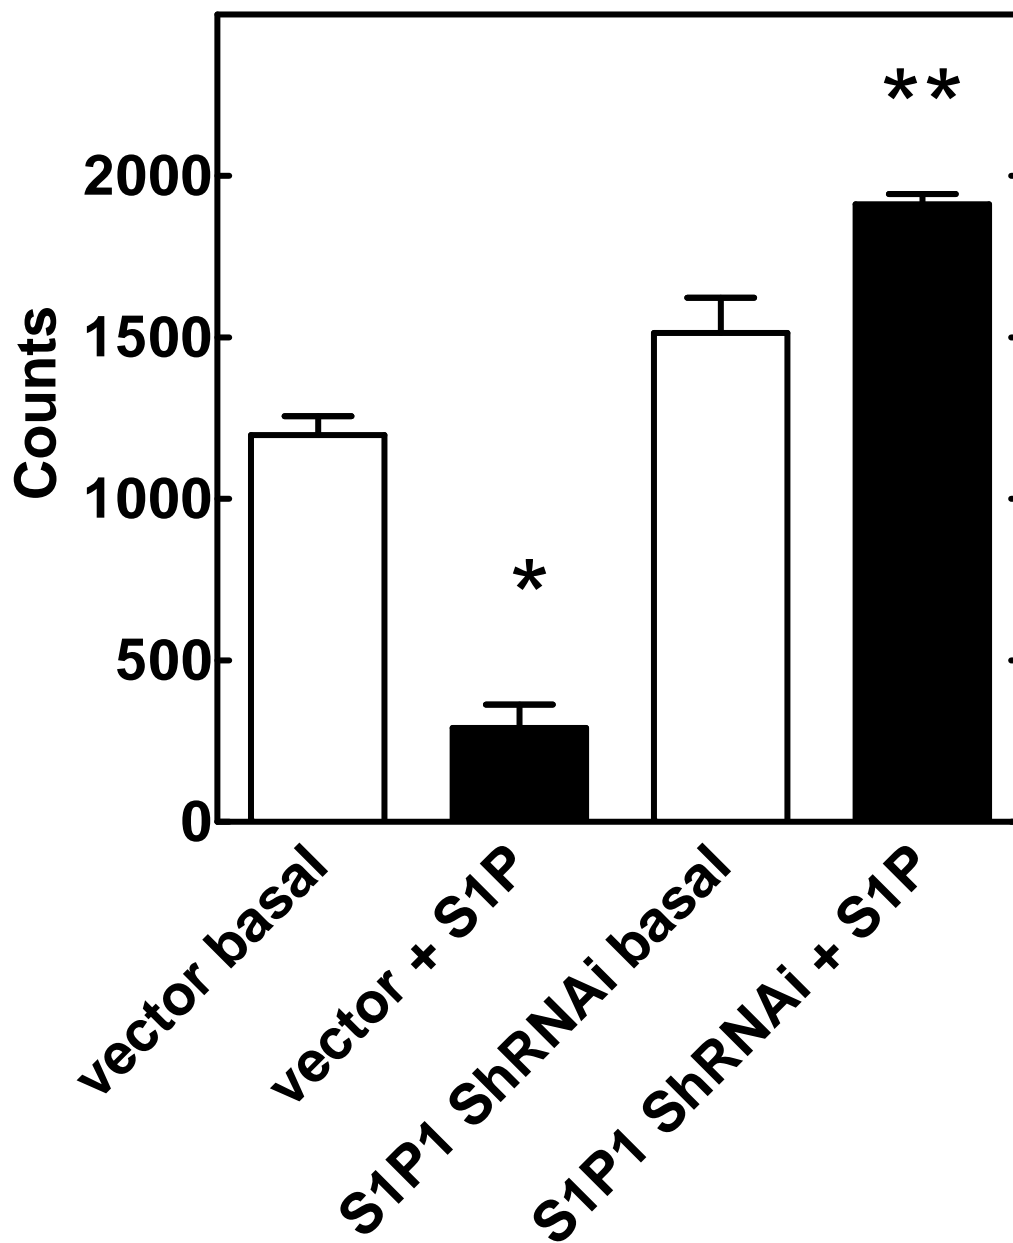

Fig. S4. Confocal microscopy images of cells expressing  $\alpha_{1B}$ -adrenergic receptor-enhanced green fluorescent protein construction; effect of wild type sphingosine kinase-1 expression. Cells transfected with wild type sphingosine kinase-1 were used and incubated in the absence or presence of 100 ng/ml IGF-I or 1  $\mu$ M S1P. Images were taken at the beginning of incubation (Time 0') and at the end of the incubation with the agents (Time 15'); immediately the membrane marker FM4-64 (red) was added and images were taken. Merge images (end of incubation-FM4-64) are presented for colocalization (yellow). Quantitative analysis of plasma membrane-associated fluorescence is shown below the images. \*  $p < 0.001$  vs. SPHK-1 wild-type.

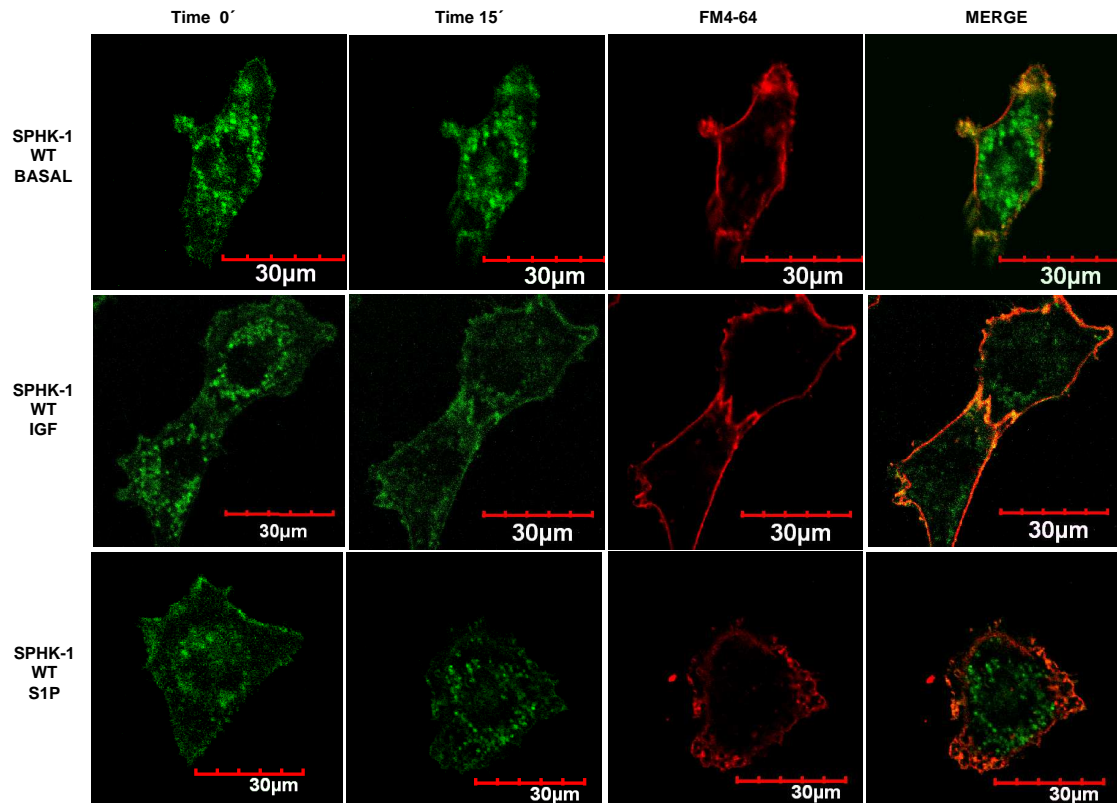

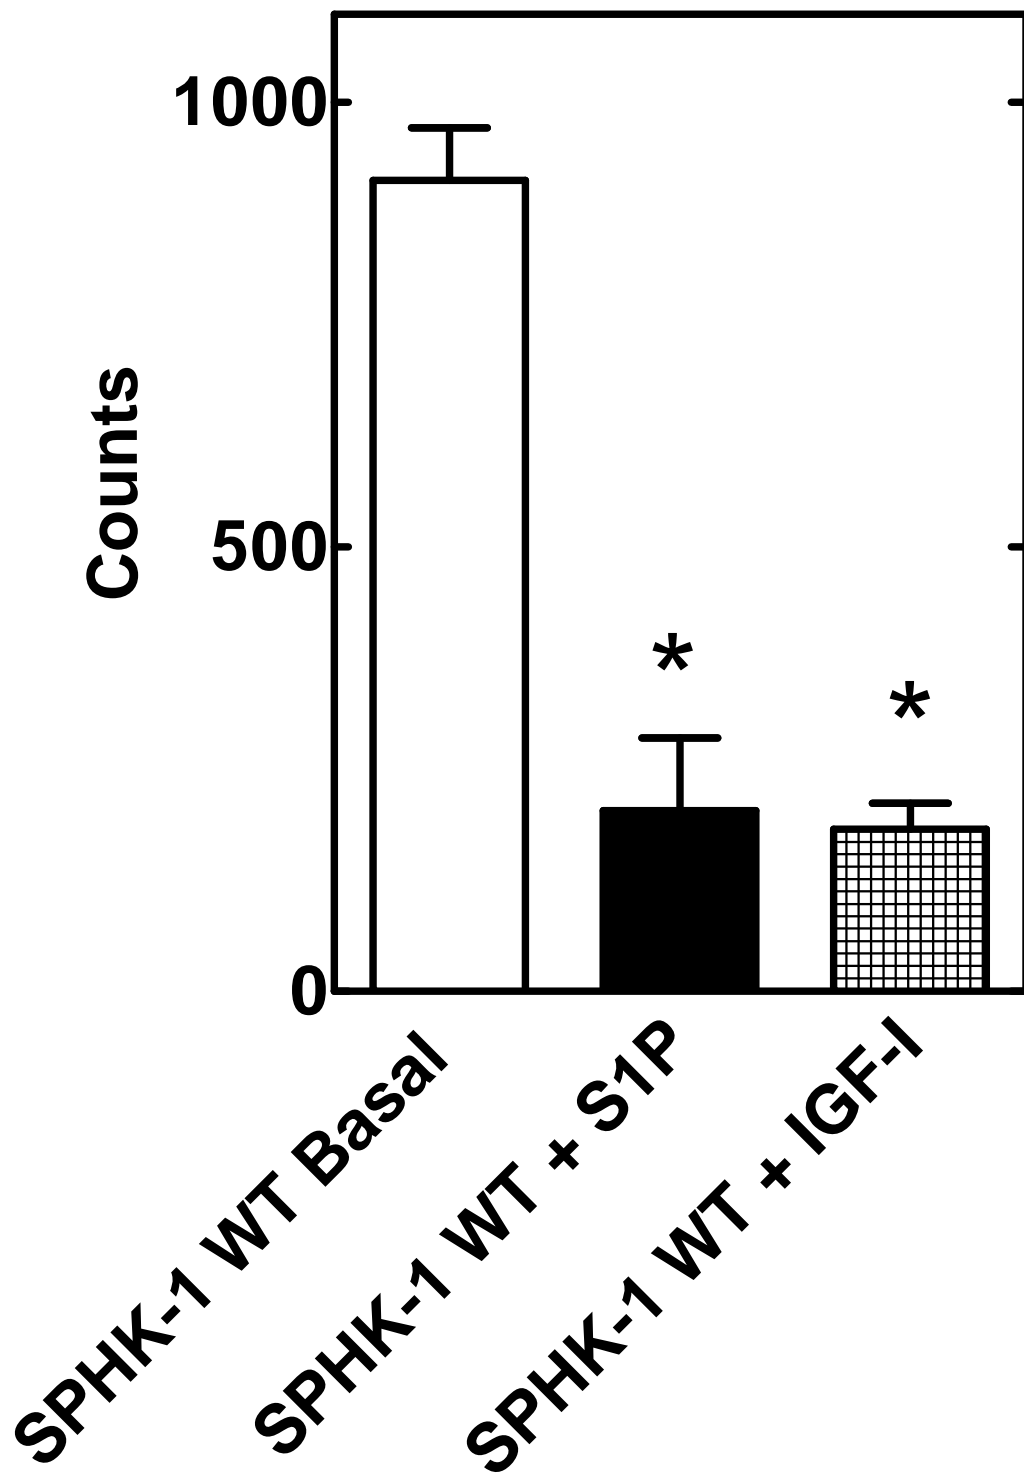

Fig. S5. Confocal microscopy images of cells expressing  $\alpha_{1B}$ -adrenergic receptor-enhanced green fluorescent protein construction; effect of expression of a dominant-negative mutant of sphingosine kinase-1 (SPHK-1 DN). Cells transfected with the dominant negative mutant of sphingosine kinase-1 were used and incubated in the absence or presence of 100 ng/ml IGF-I or 1  $\mu$ M S1P. Images were taken at the beginning of incubation (Time 0') and at the end of incubation with the agents (Time 15'); immediately thereafter, the membrane marker FM4-64 (red) was added and images were taken. Merge images (end of incubation-FM4-64) are presented for colocalization (yellow). Quantitative analysis of plasma membrane-associated fluorescence is shown below the images. \*  $p < 0.01$  vs. SPHK-1 DN Basal.

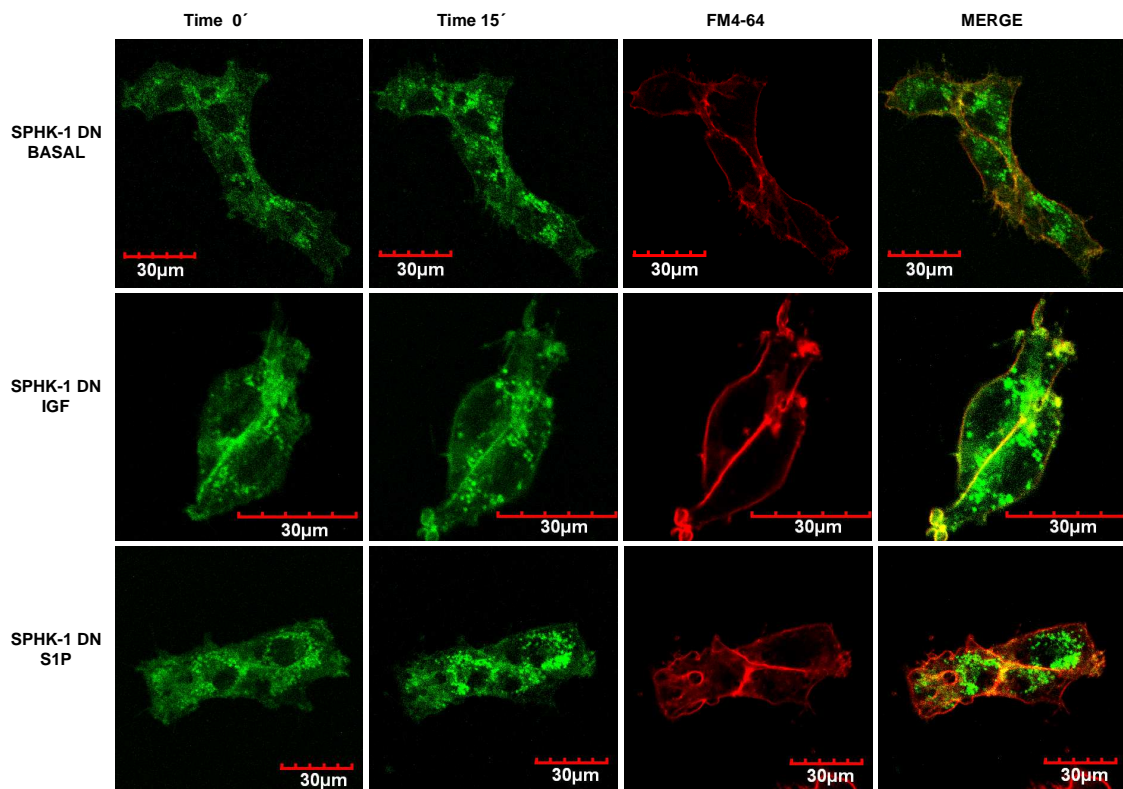

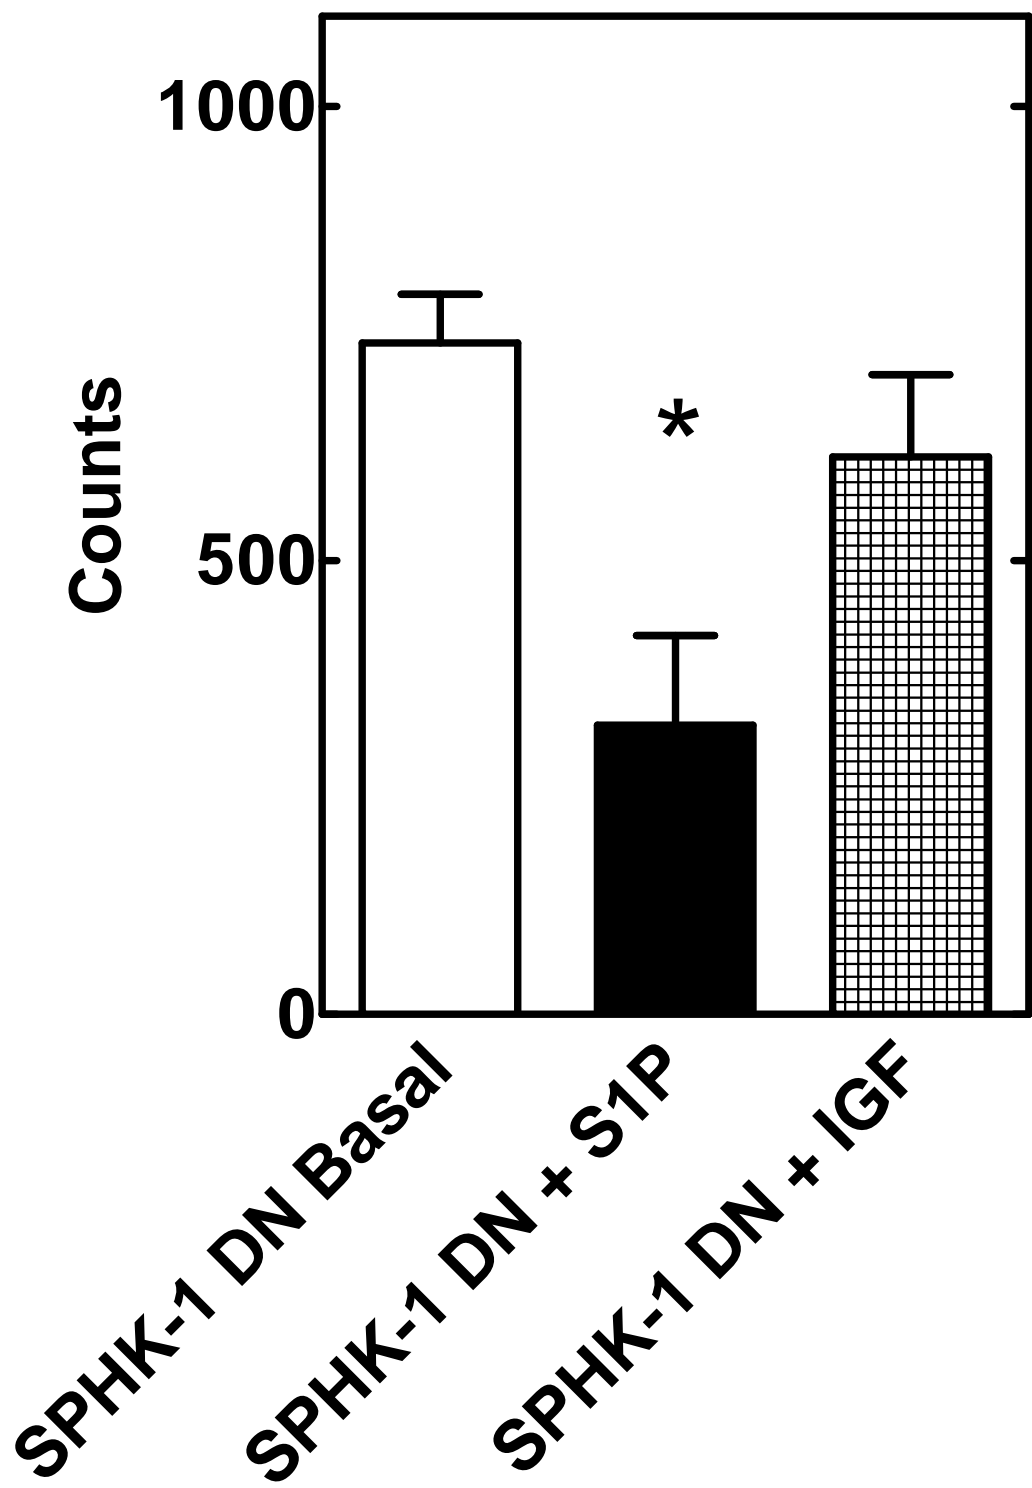

Supplement: NIHMS349987-supplement-01.pdf [file NIHMS349987-supplement-01.pdf]
